# Supplementary material
Source: PubMed Central journal article supplement (PMC3085963)
Supplement: NIHMS285389-supplement-1_si_001.pdf [file NIHMS285389-supplement-1_si_001.pdf]

## SUPPLEMENTARY INFORMATION

### Mass spectrometric characterization of oligomers in *Pseudomonas aeruginosa* azurin solutions

Lucie Sokolová,<sup>a</sup> Heather Williamson,<sup>b</sup> Jan Sýkora,<sup>c</sup> Martin Hof,<sup>c</sup> Harry B. Gray,<sup>b,\*</sup> Bernd Brutschy,<sup>a,\*</sup> and Antonín Vlček, Jr.<sup>c,d,\*</sup>

<sup>a</sup> Institute of Physical and Theoretical Chemistry, Goethe-Universität, Max-von-Laue-Str. 7, 60438 Frankfurt am Main, Germany

<sup>b</sup> Beckman Institute, California Institute of Technology, Pasadena, CA 91125, USA

<sup>c</sup> J. Heyrovský Institute of Physical Chemistry, Academy of Sciences of the Czech Republic, Dolejškova 3, CZ-182 23 Prague, Czech Republic

<sup>d</sup> Queen Mary University of London, School of Biological and Chemical Sciences, Mile End Road, London E1 4NS, United Kingdom

E-mail: a.vlcek@qmul.ac.uk, brutschy@chemie.uni-frankfurt.de, hbgray@caltech.edu

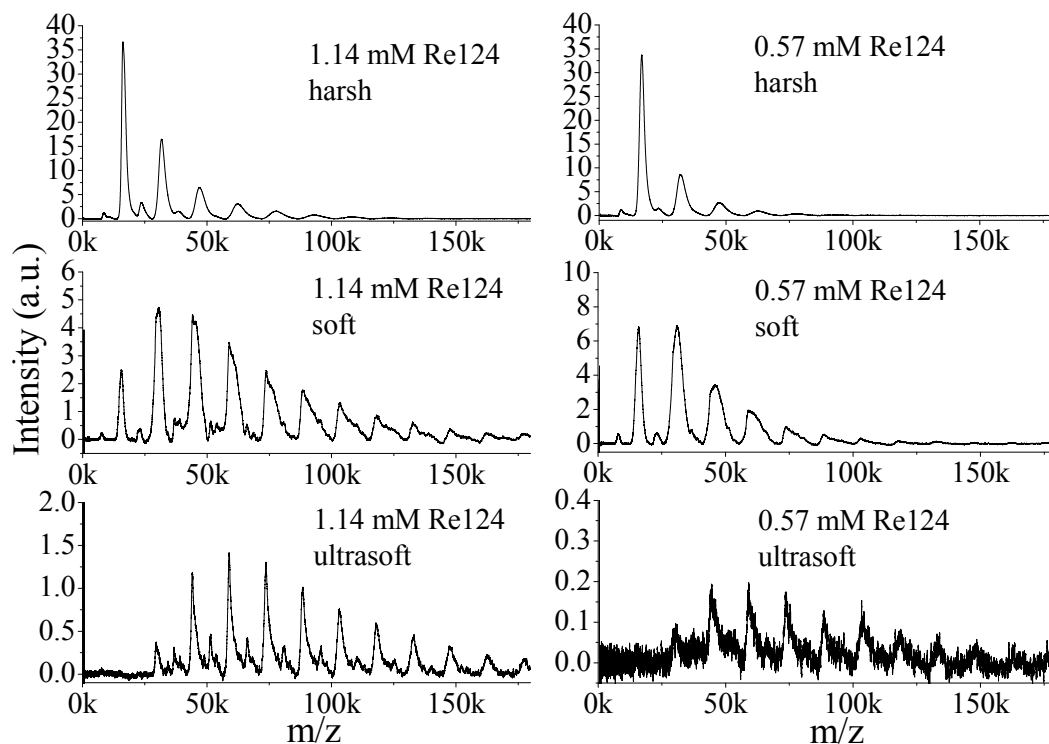

**Figure S1.** Anion LILBID spectra of Re124 in 30 mM NaCl measured at different laser intensities and two concentrations, 1.1 mM (left column) and 0.6 mM (right column).

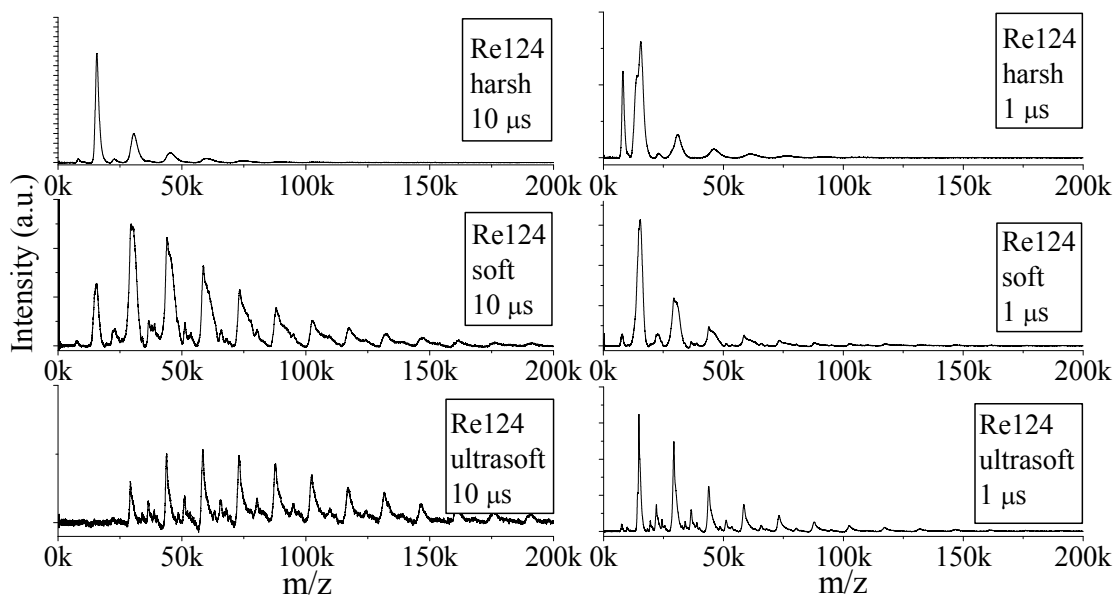

**Figure S2.** Anion LILBID spectra of 1.1 mM Re124 in 30 mM NaCl measured at different laser intensities and two time delays, 10  $\mu$ s (left column) and 1  $\mu$ s (right column).

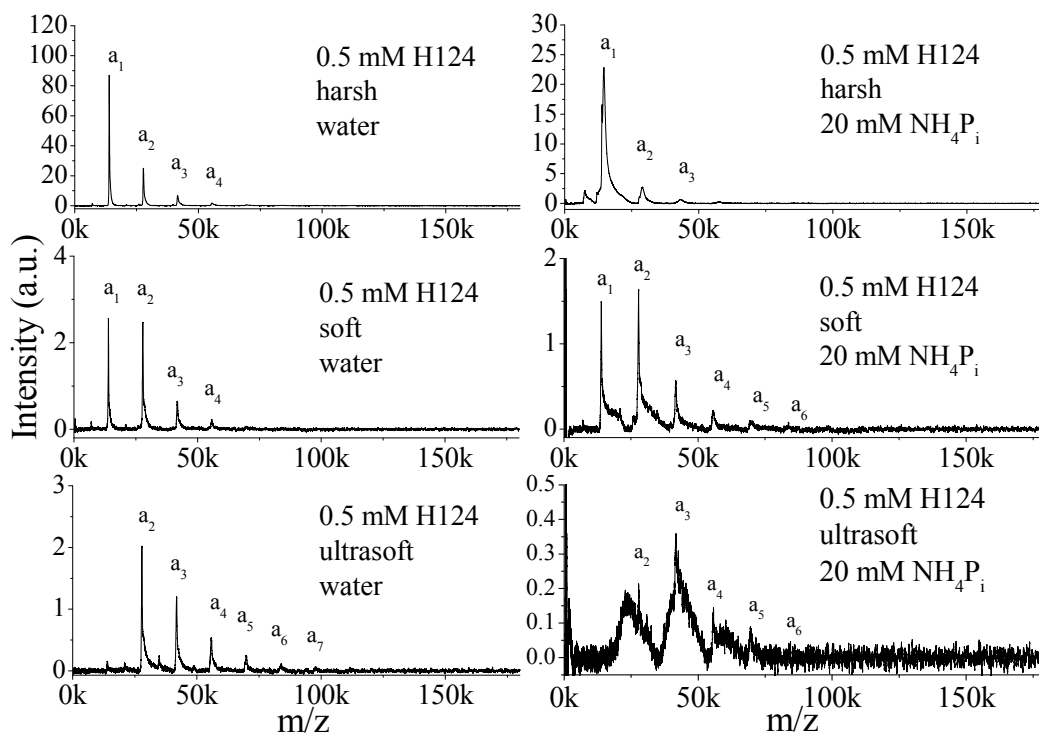

**Figure S3.** Anion LILBID spectra of H124 in measured at different laser intensities in pure water (left column) and 20 mM  $\text{NH}_4\text{P}_i$  (right column).

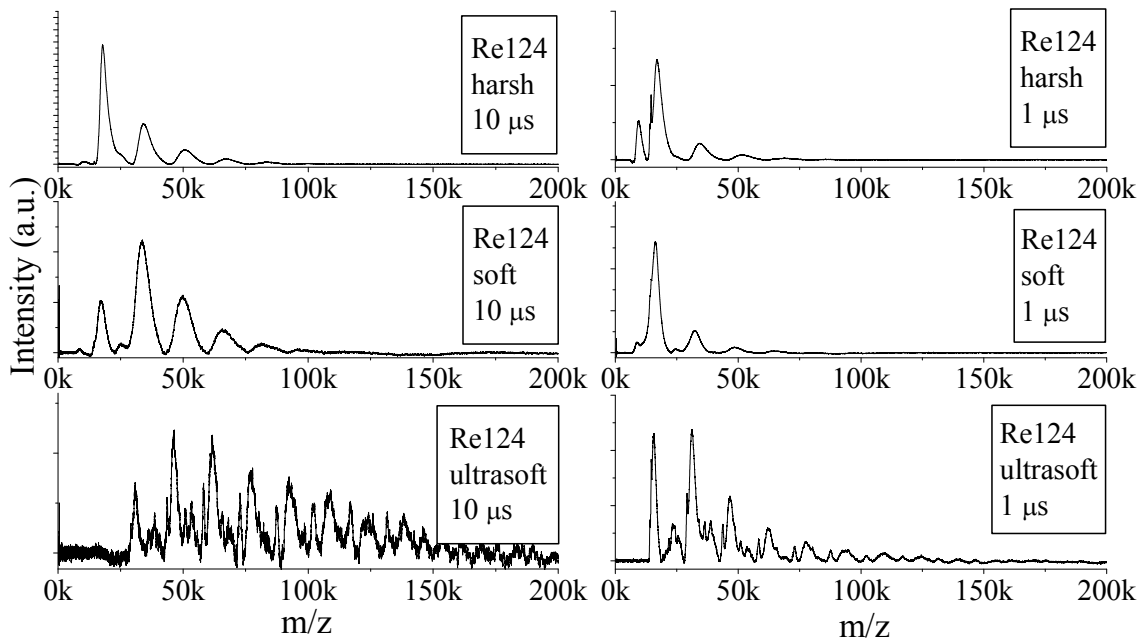

**Figure S4.** Anion LILBID spectra of 1.1 mM Re124 in 20 mM NaP<sub>i</sub> measured at different laser intensities and two delay times, 10  $\mu$ s (left column) and 1  $\mu$ s (right column).

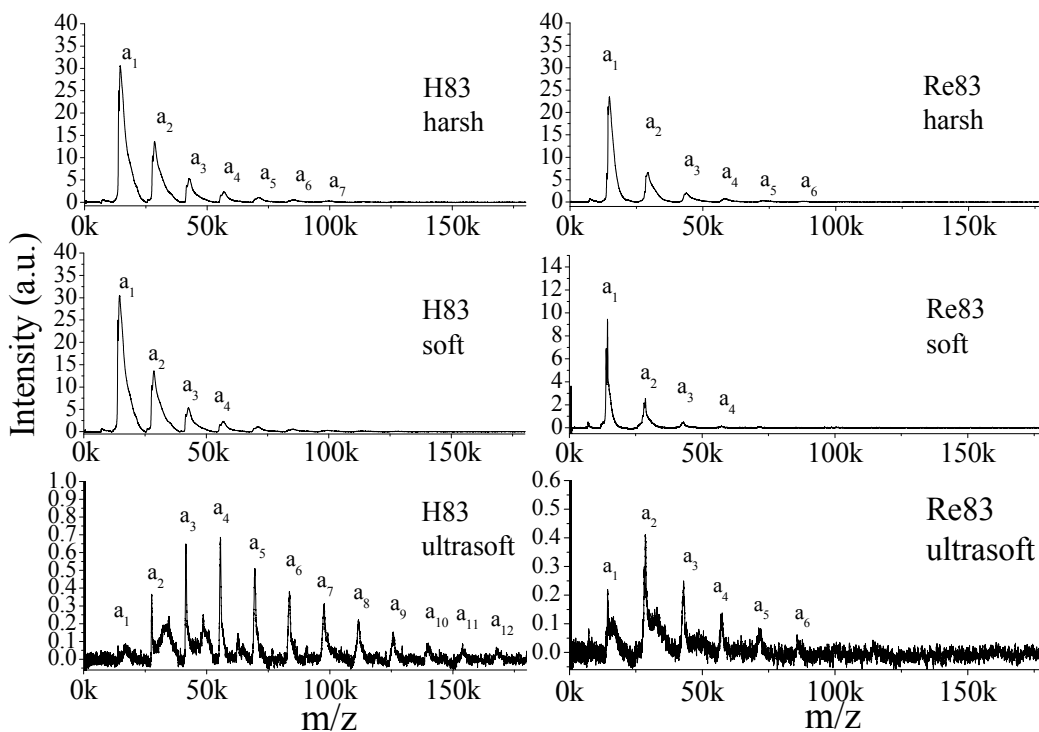

**Figure S5.** Anion LILBID spectra of 0.6 mM H83 (left column) and 0.6 mM Re83 (right column) in 20 mM NH<sub>4</sub>P<sub>i</sub> measured at different laser intensities.

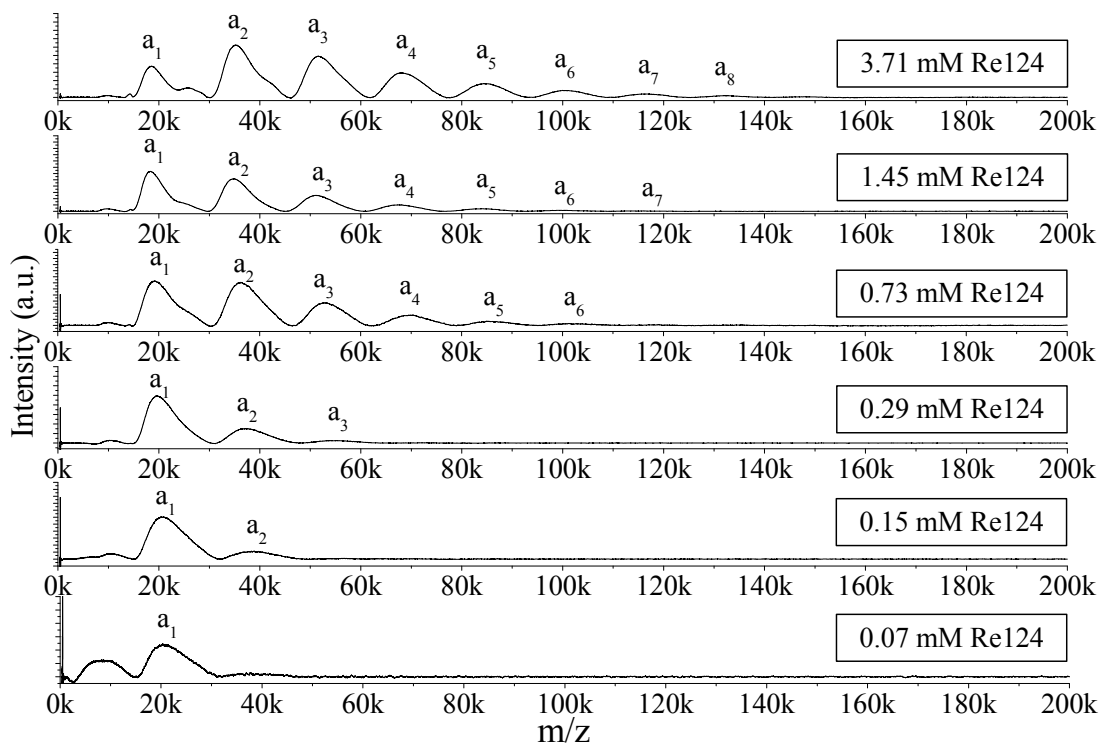

**Figure S6.** Concentration dependence of Re124 LILBID spectra in 20 mM NaPi at harsh conditions.

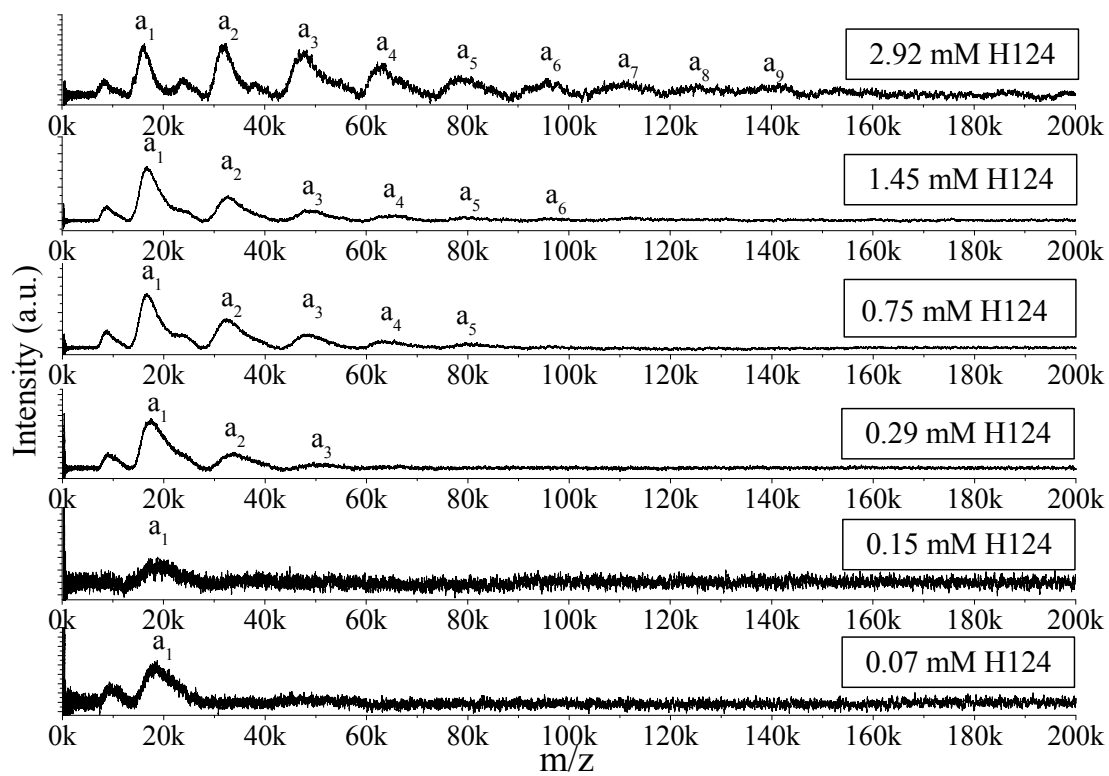

**Figure S7.** Concentration dependence of anion LILBID spectra of H124 in 20 mM NaP<sub>i</sub> at soft conditions.

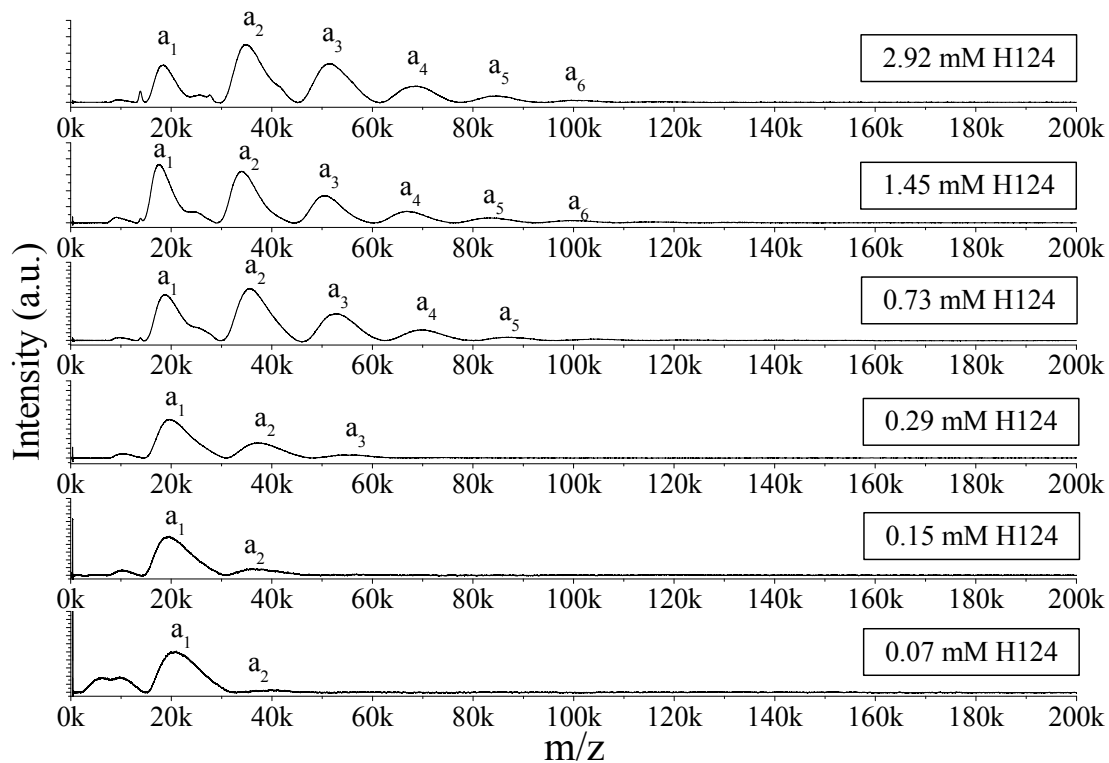

**Figure S8.** Concentration dependence of anion LILBID spectra of H124 in 20 mM NaPi at harsh conditions.

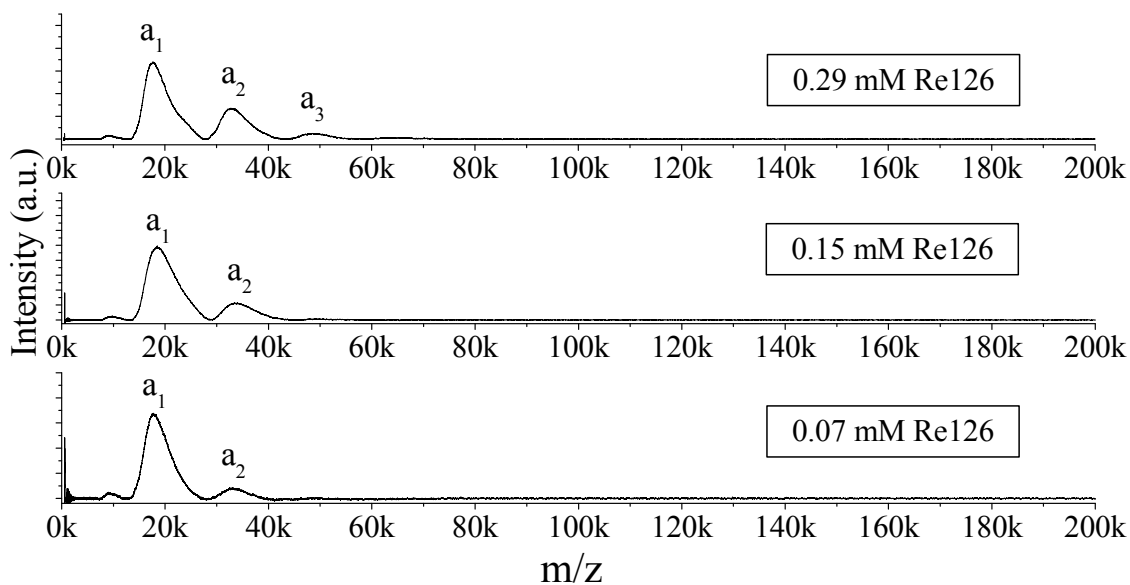

**Figure S9.** Concentration dependence of anion LILBID spectra of Re126 in 20 mM NaPi at soft conditions.

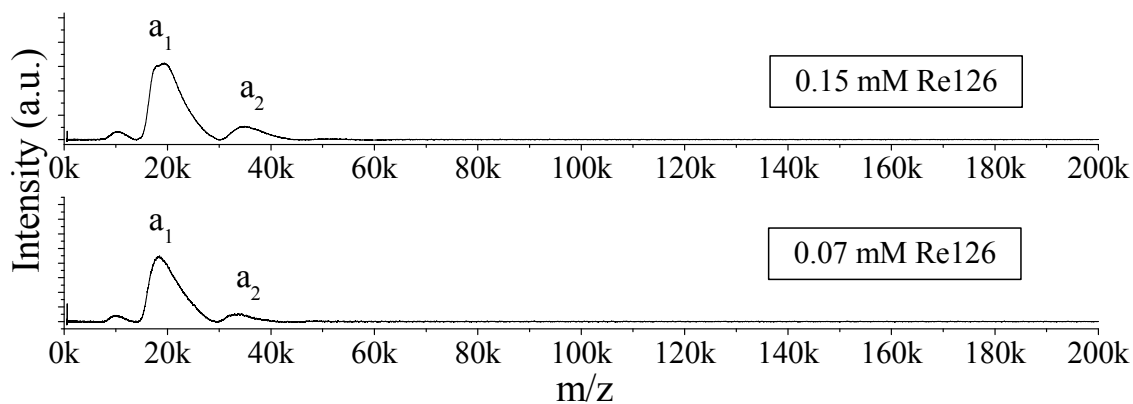

**Figure S10.** Concentration dependence of anion LILBID spectra of Re126 in 20 mM NaP<sub>i</sub> at harsh conditions.

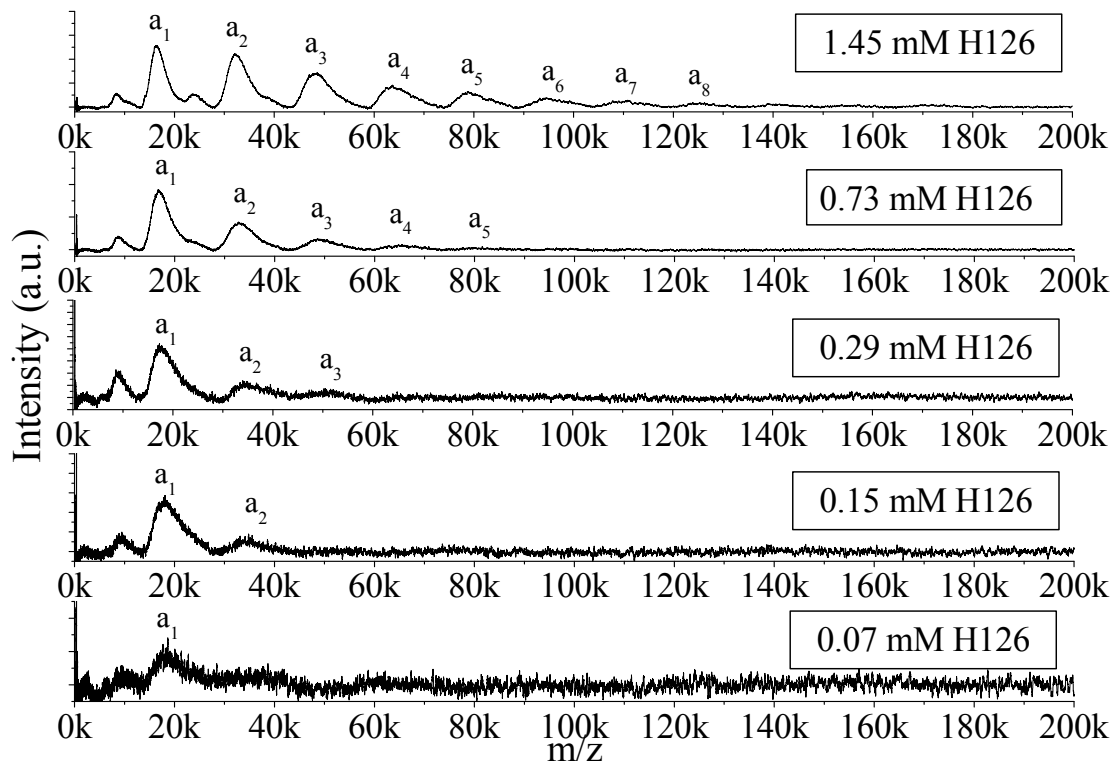

**Figure S11.** Concentration dependence of anion LILBID spectra of H126 in 20 mM NaP<sub>i</sub> at soft conditions.

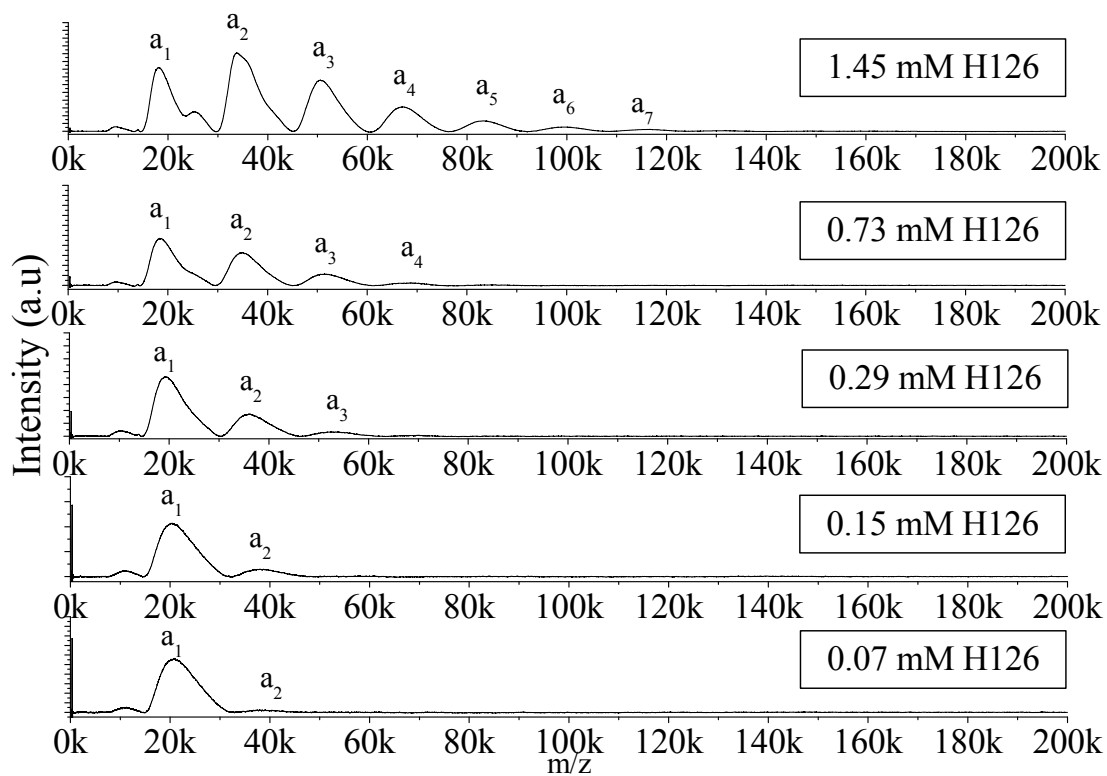

**Figure S12.** Concentration dependence of anion LILBID spectra of H126 in 20 mM NaP<sub>i</sub> at harsh conditions.



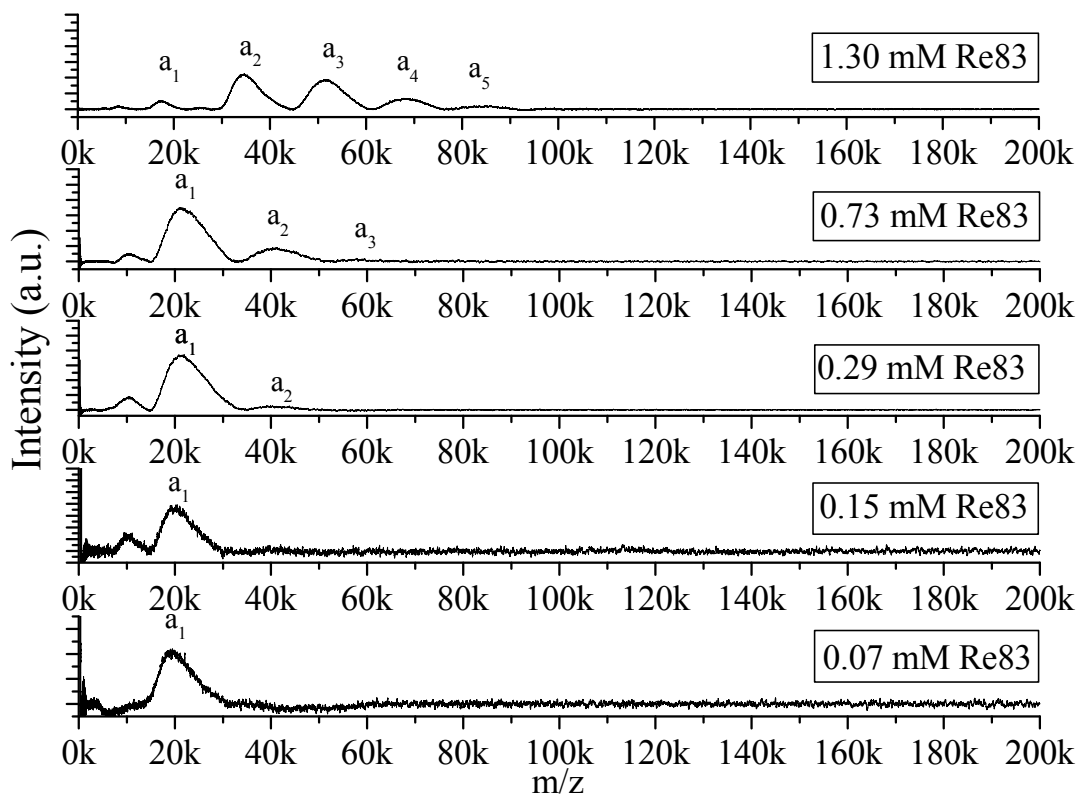

**Figure S13.** Concentration dependence of anion LILBID spectra of Re83 in 20 mM  $\text{NaP}_i$  at soft conditions.

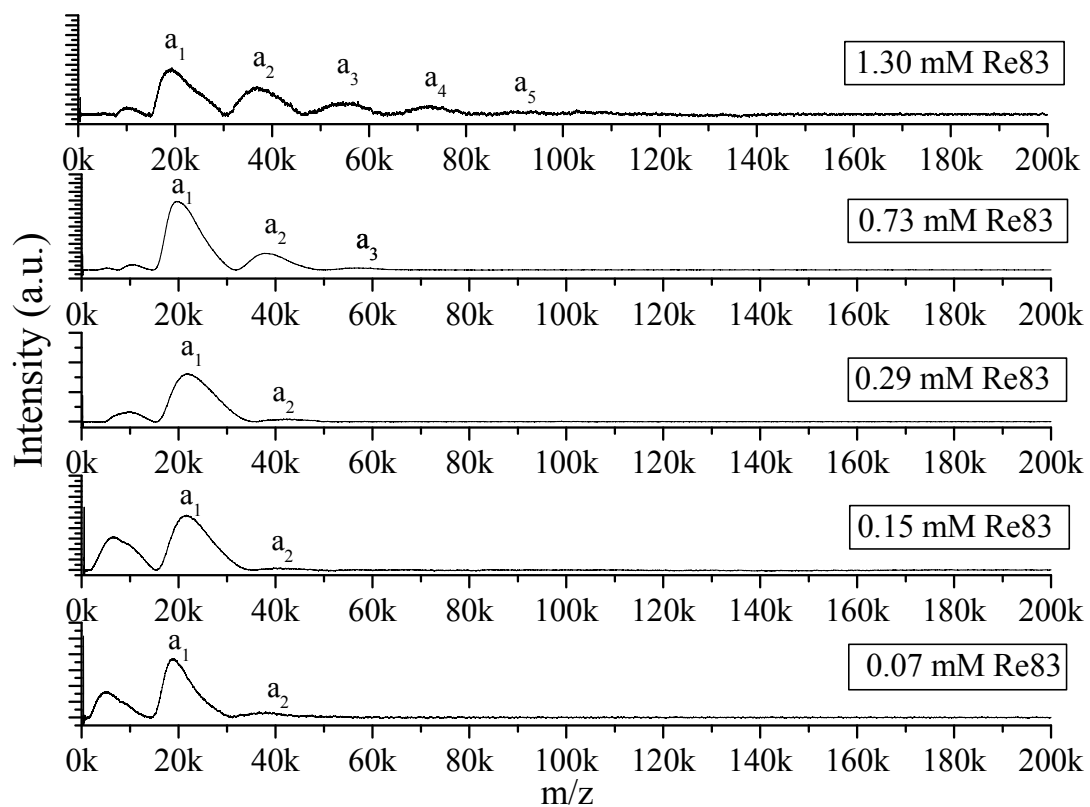

**Figure S14.** Concentration dependence of anion LILBID spectra of Re83 in 20 mM NaP<sub>i</sub> at harsh conditions.

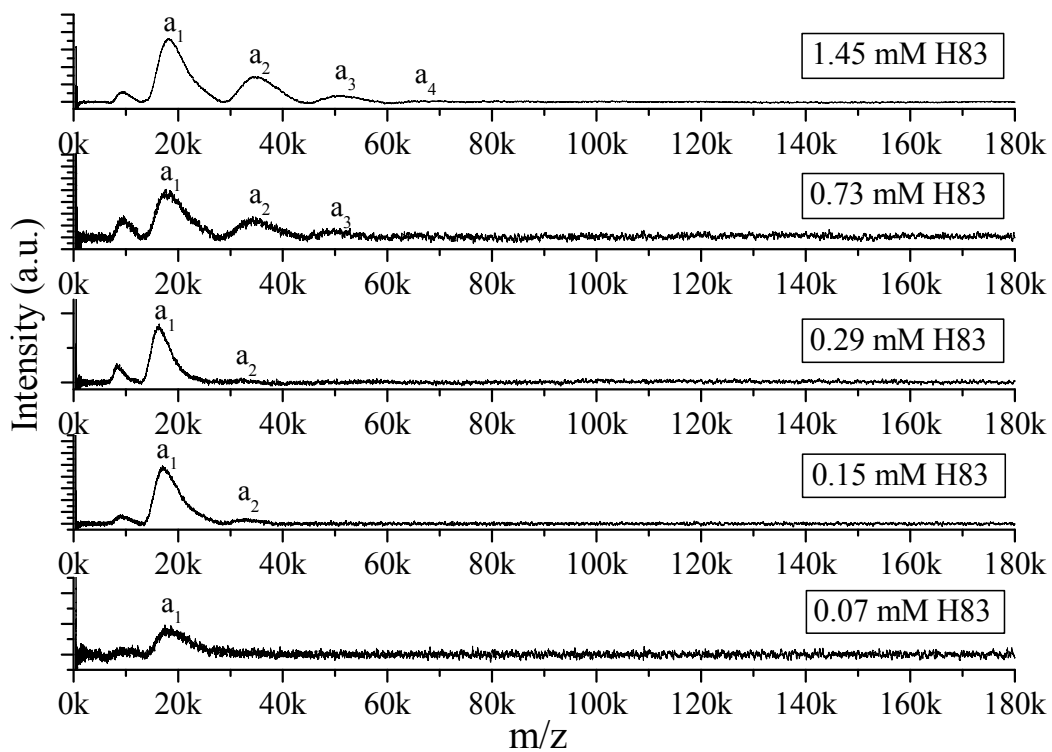

**Figure S15.** Concentration dependence of anion LILBID spectra of H83 in 20 mM NaP<sub>i</sub> at soft conditions.

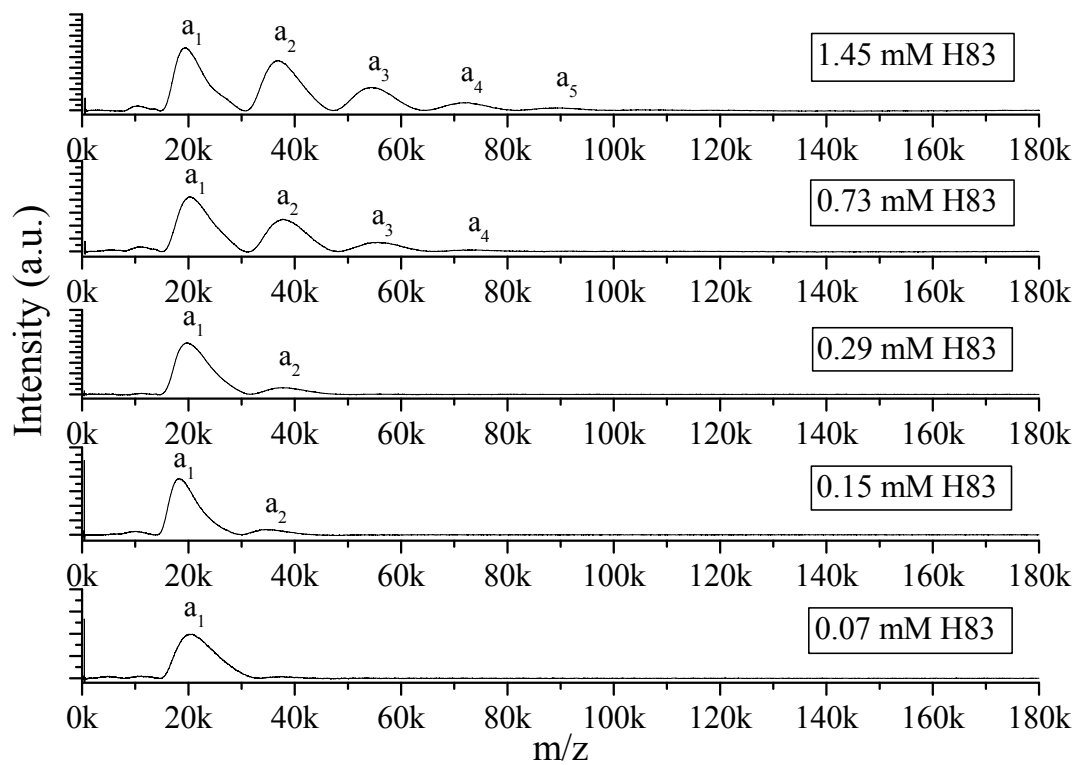

**Figure S16.** Concentration dependence of anion LILBID spectra of H83 in 20 mM NaP<sub>i</sub> at harsh conditions.

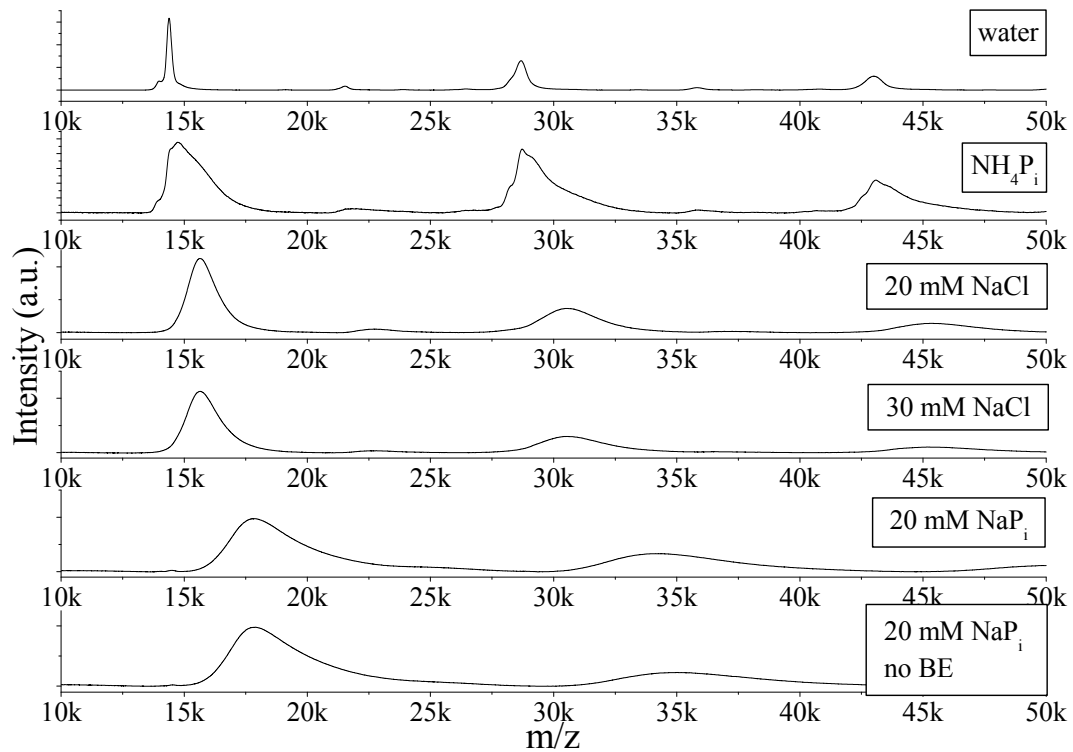

**Figure S17.** Effects of solution composition on LILBID spectra of H124 at harsh conditions.

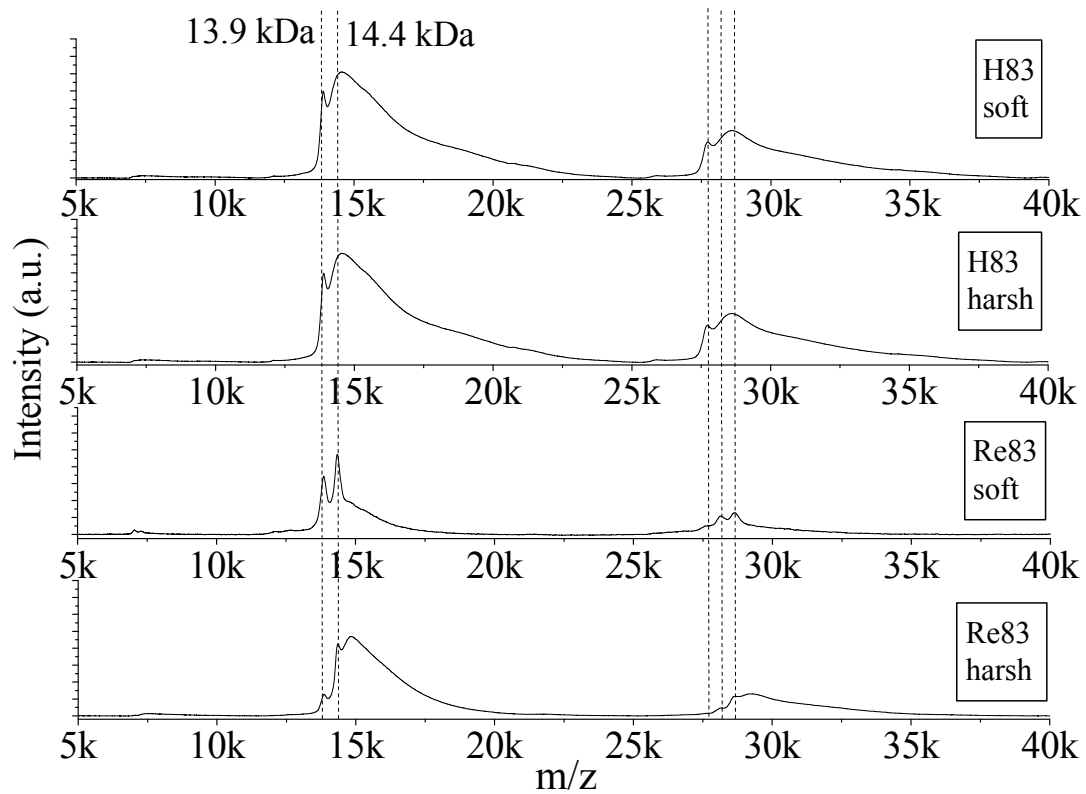

**Figure S18.** LILBID spectra of H83 and Re83 in 20 mM  $\text{NH}_4\text{P}_i$  at soft and harsh conditions. The dashed lines represent expected positions of H83 and Re83 monomers and dimers.

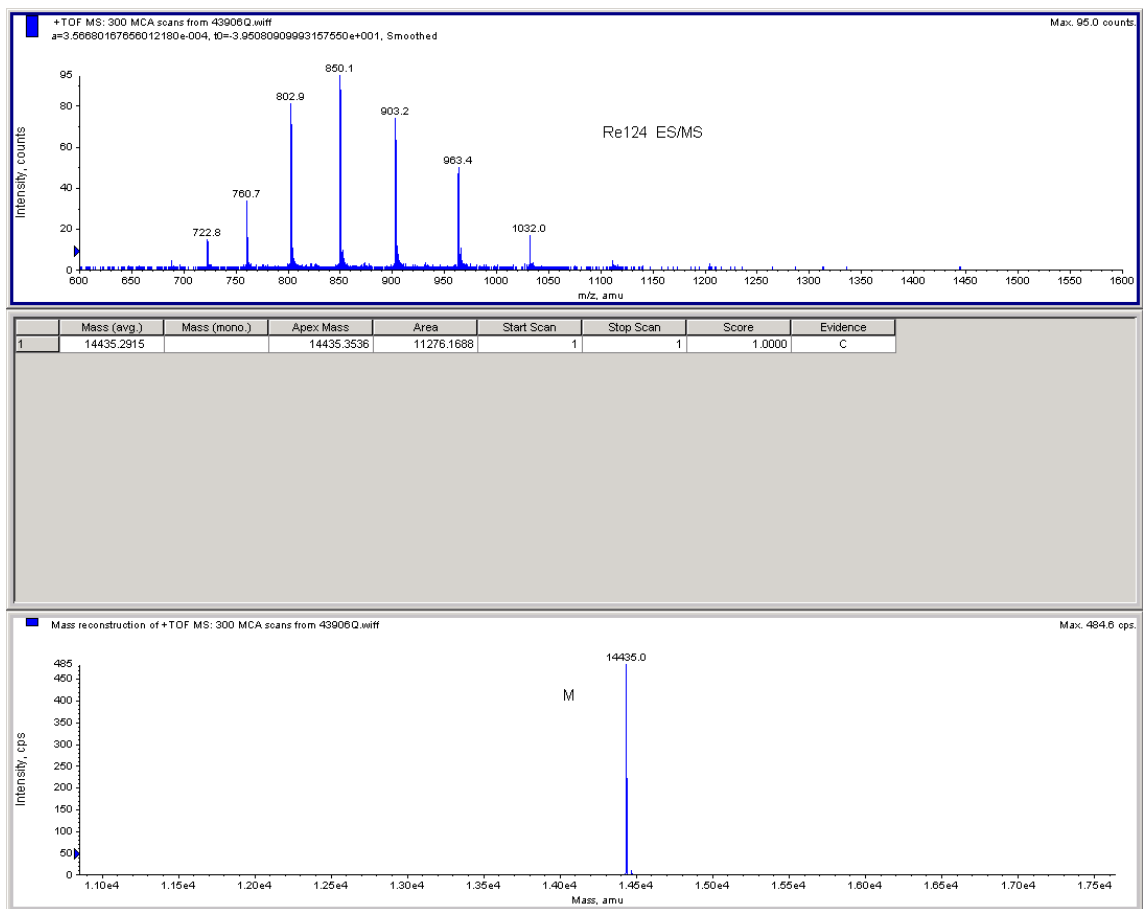

**Figure S19.** ESI MS spectrum of Re124 measured *ca.* 2 months after the LILBID MS measurement. The same sample was used for both experiments. A 2-year old Re126 sample (kept in solution at  $\sim 4$  °C) gave a comparable spectrum with no signs of Re-label dissociation.)

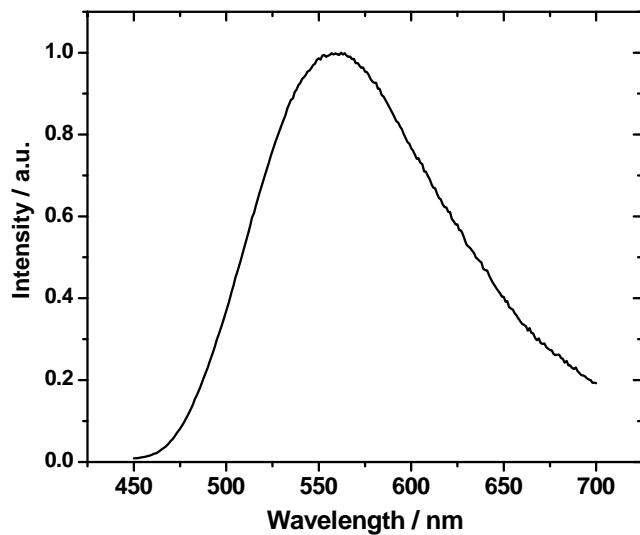

**Figure S20.** Stationary emission spectrum of 1.3 mM Re83 in 20 mM NaPi. Excited at 370 nm.

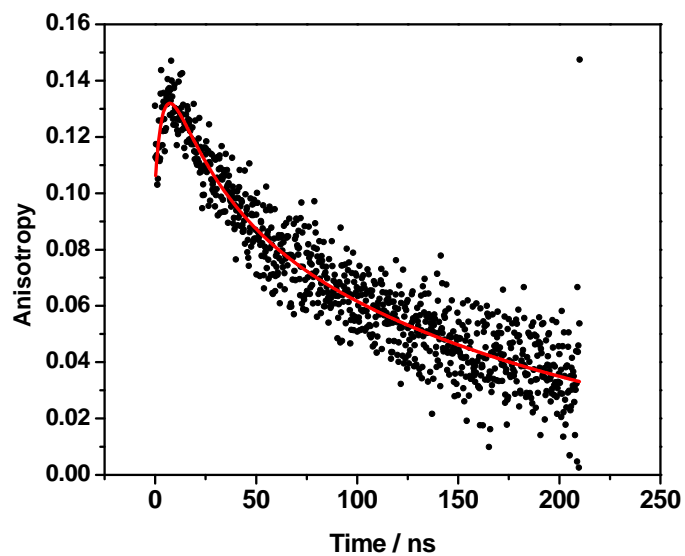

**Figure S21.** Time-dependent emission anisotropy of 1.86 mM Re124 denatured with 4 M Guanine-HCl. Red curve: fit with  $\tau$  values:  $3.8 \pm 1.0$  ns (rise),  $26.6 \pm 7.2$  ns (minor decay),  $183 \pm 13$  ns (major decay).
